# Supplementary material for: Regulatory Networks of Flowering Genes in Angelica sinensis during Vernalization
Source: MDPI journal article supplement (doi:10.3390/plants11101355), 2022-05-19
Supplement: s1 [file s1]

Figure supplementary legends

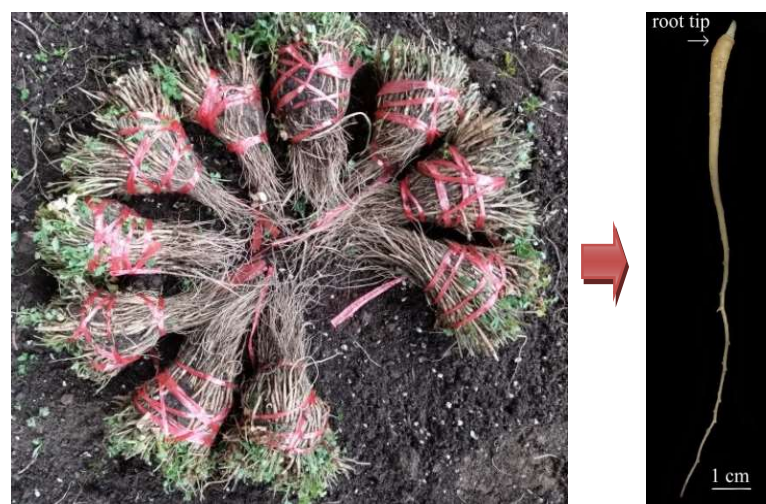

Figure S1. Morphological characteristic of *A. sinensis* seedlings.

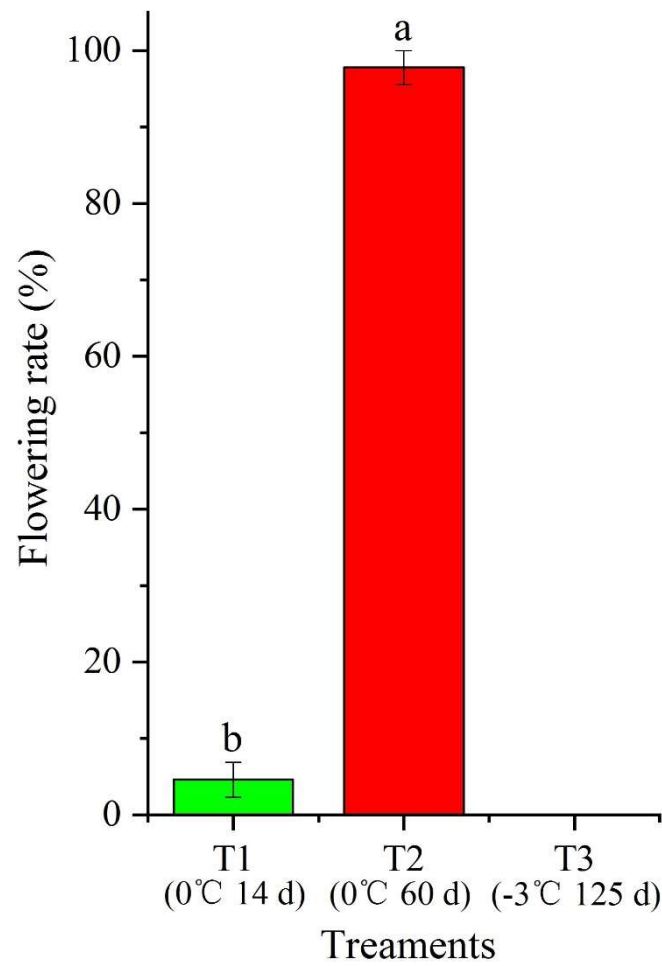

Figure S2. Flowering rate of *A. sinensis* after the seedlings stored at T1, T2 and T3. Different letters represent a significant difference ( $p<0.05$ ) at different treatments.

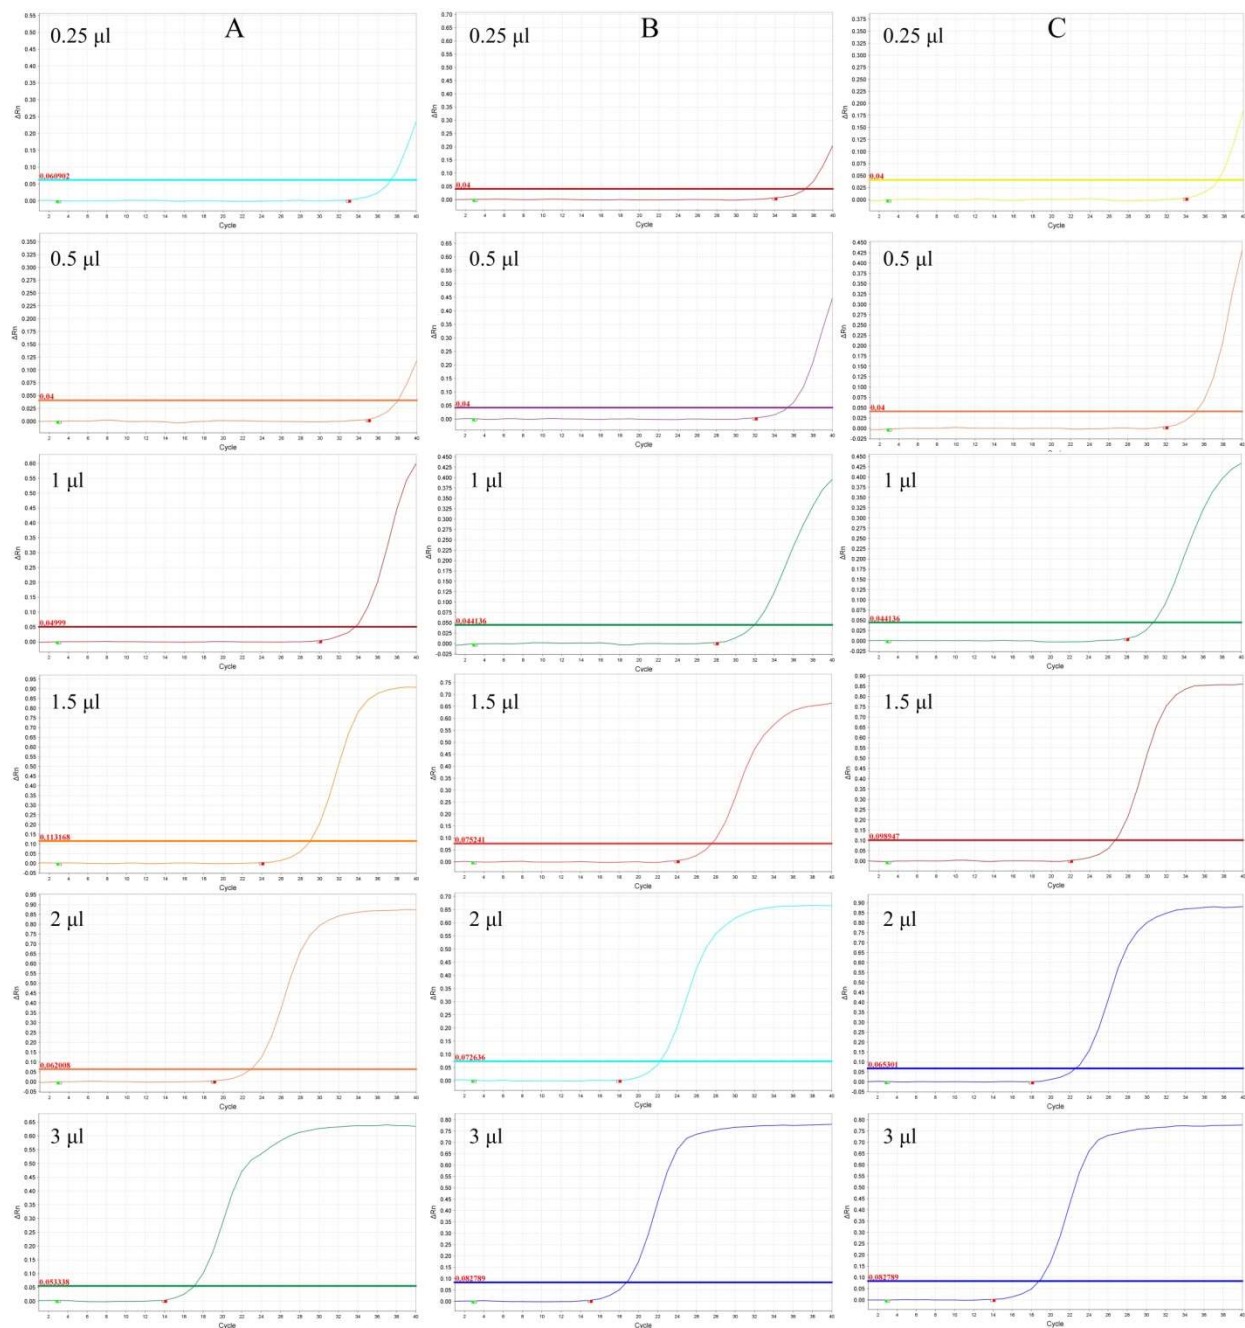

**Figure S3.** The cycle threshold (Ct) values of *ACT* gene at different volumes (0.25, 0.5, 1.0, 1.5, 2.0 and 3.0 µL) via PCR amplification with three replications.

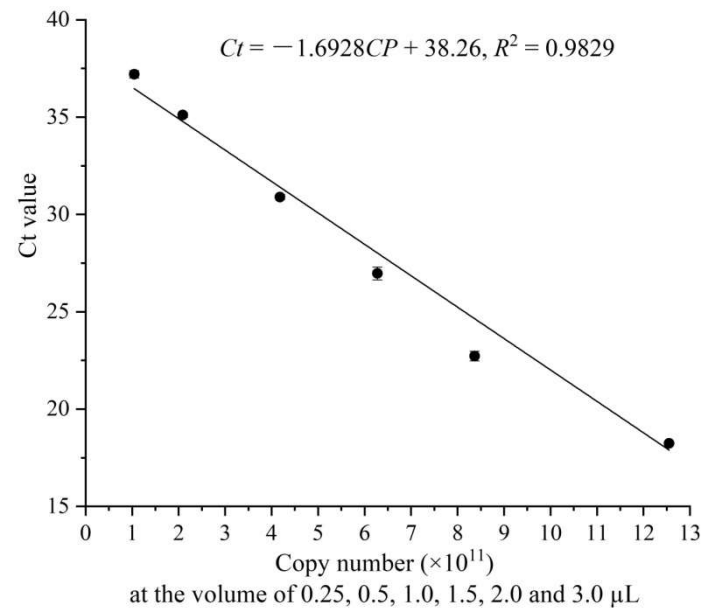

**Figure S4.** The standard curve of *ACT* gene.

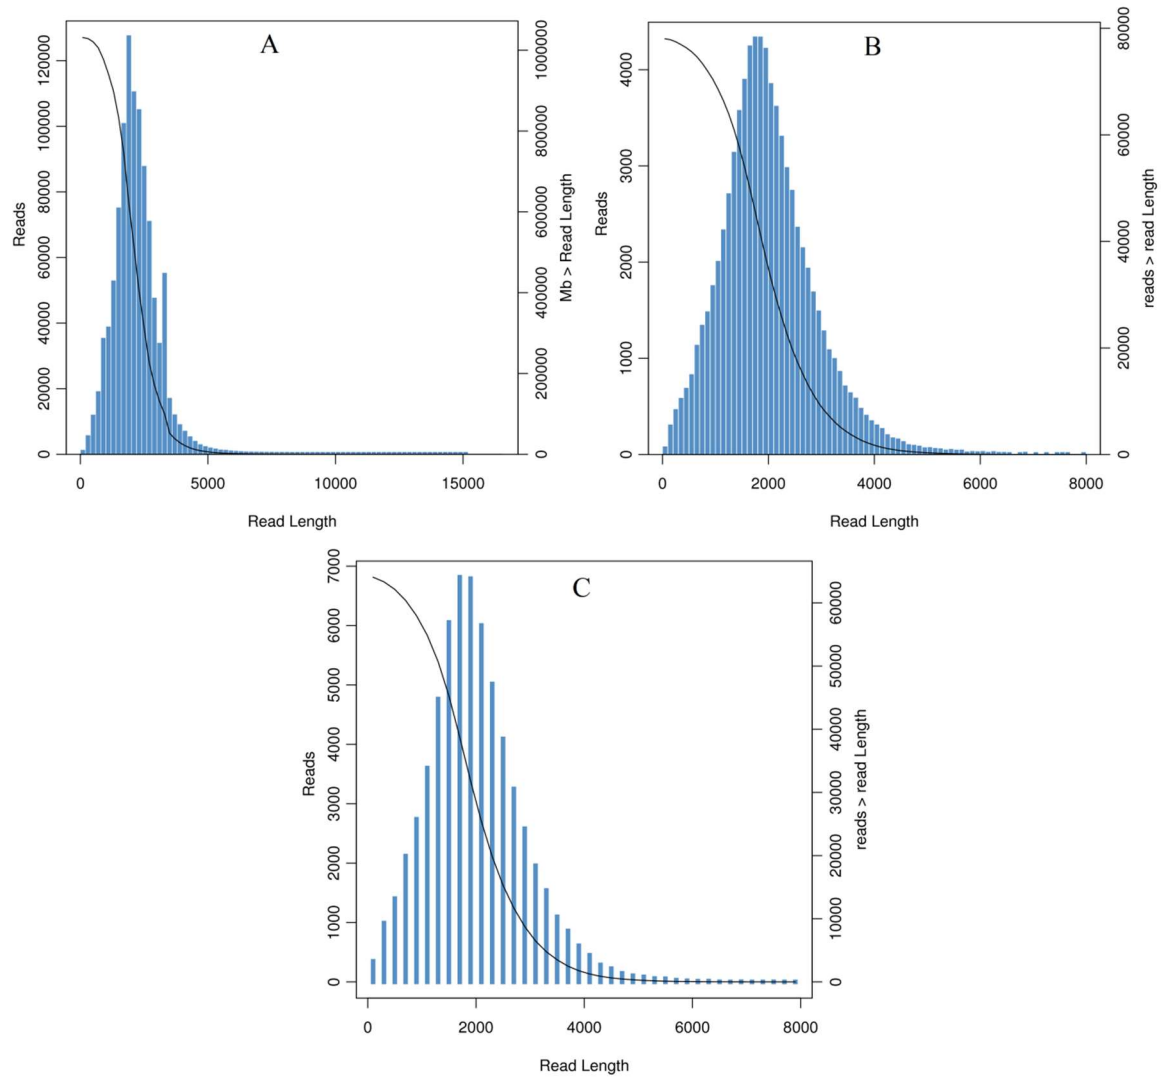

**Figure S5.** Number and length distribution of high-fidelity reads (A), polished high-quality isoforms (B) and full-length isoforms (C).

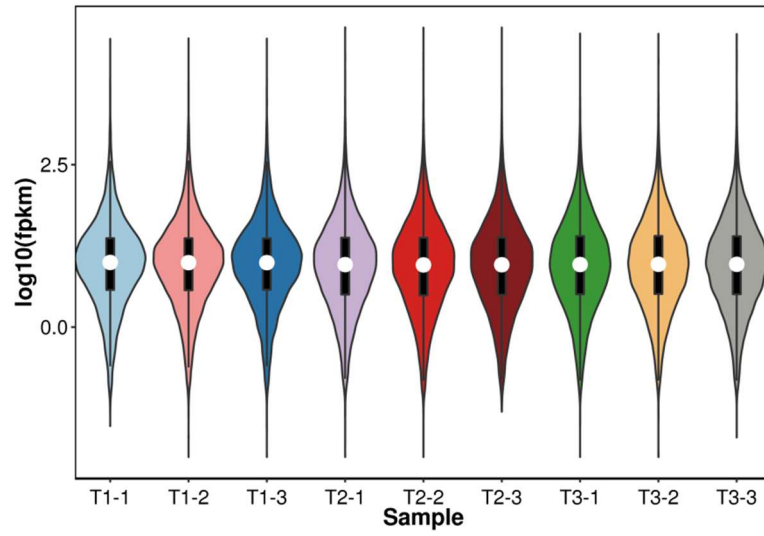

**Figure S6.** Violin plot of expression in T1, T2 and T3.

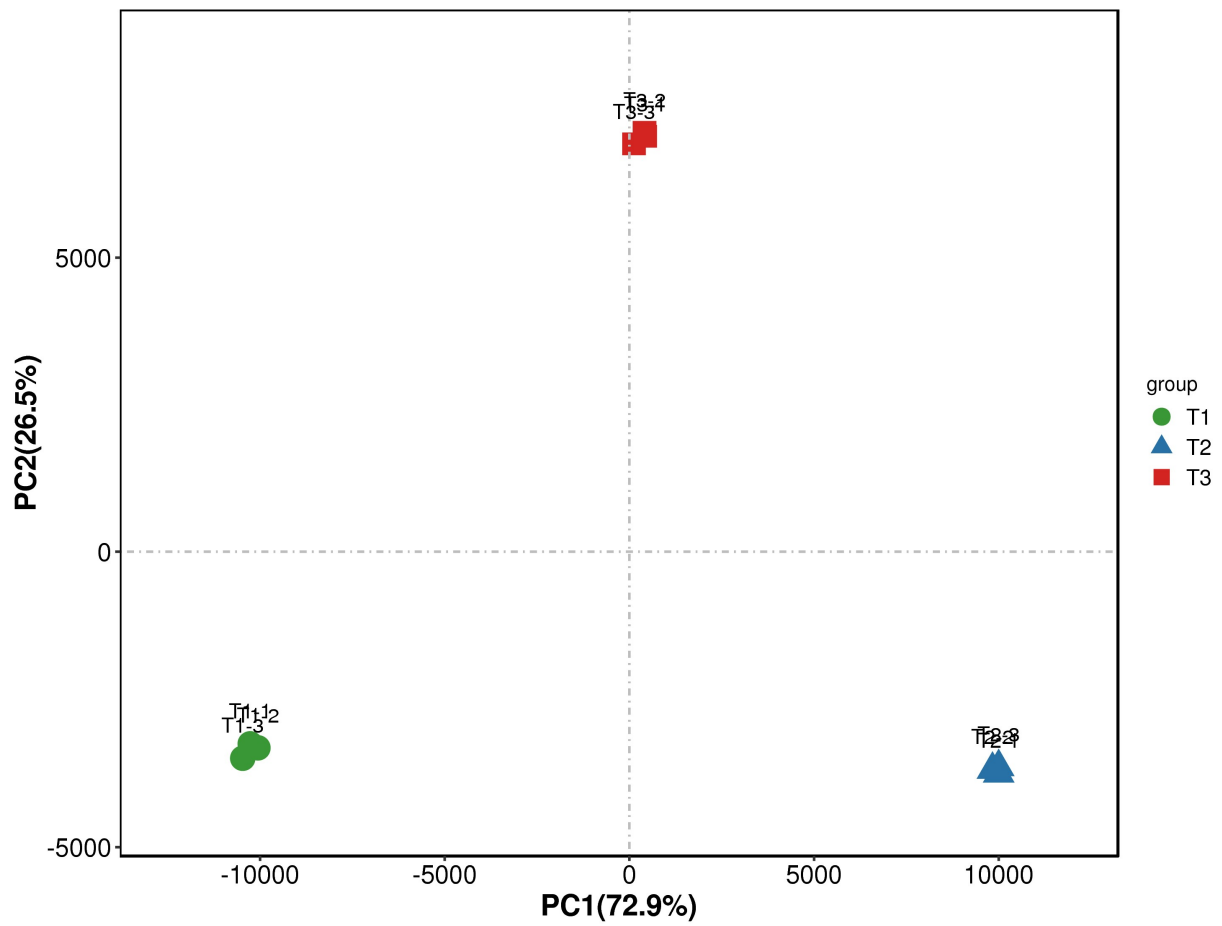

**Figure S7.** PCA analysis of T1, T2 and T3.

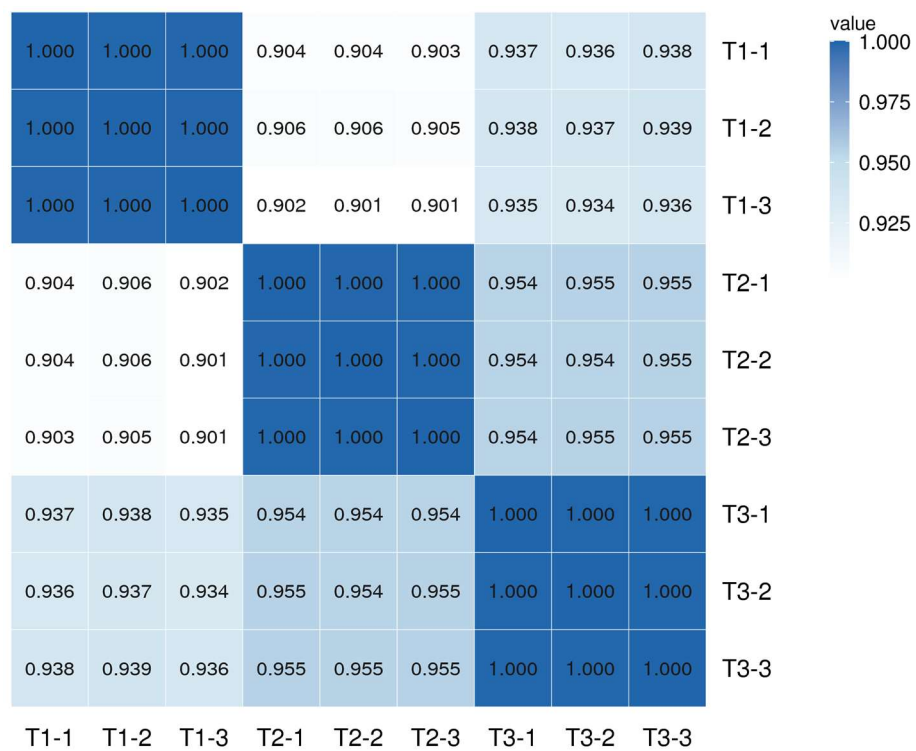

**Figure S8.** Pearson correlation analysis between T1, T2 and T3.

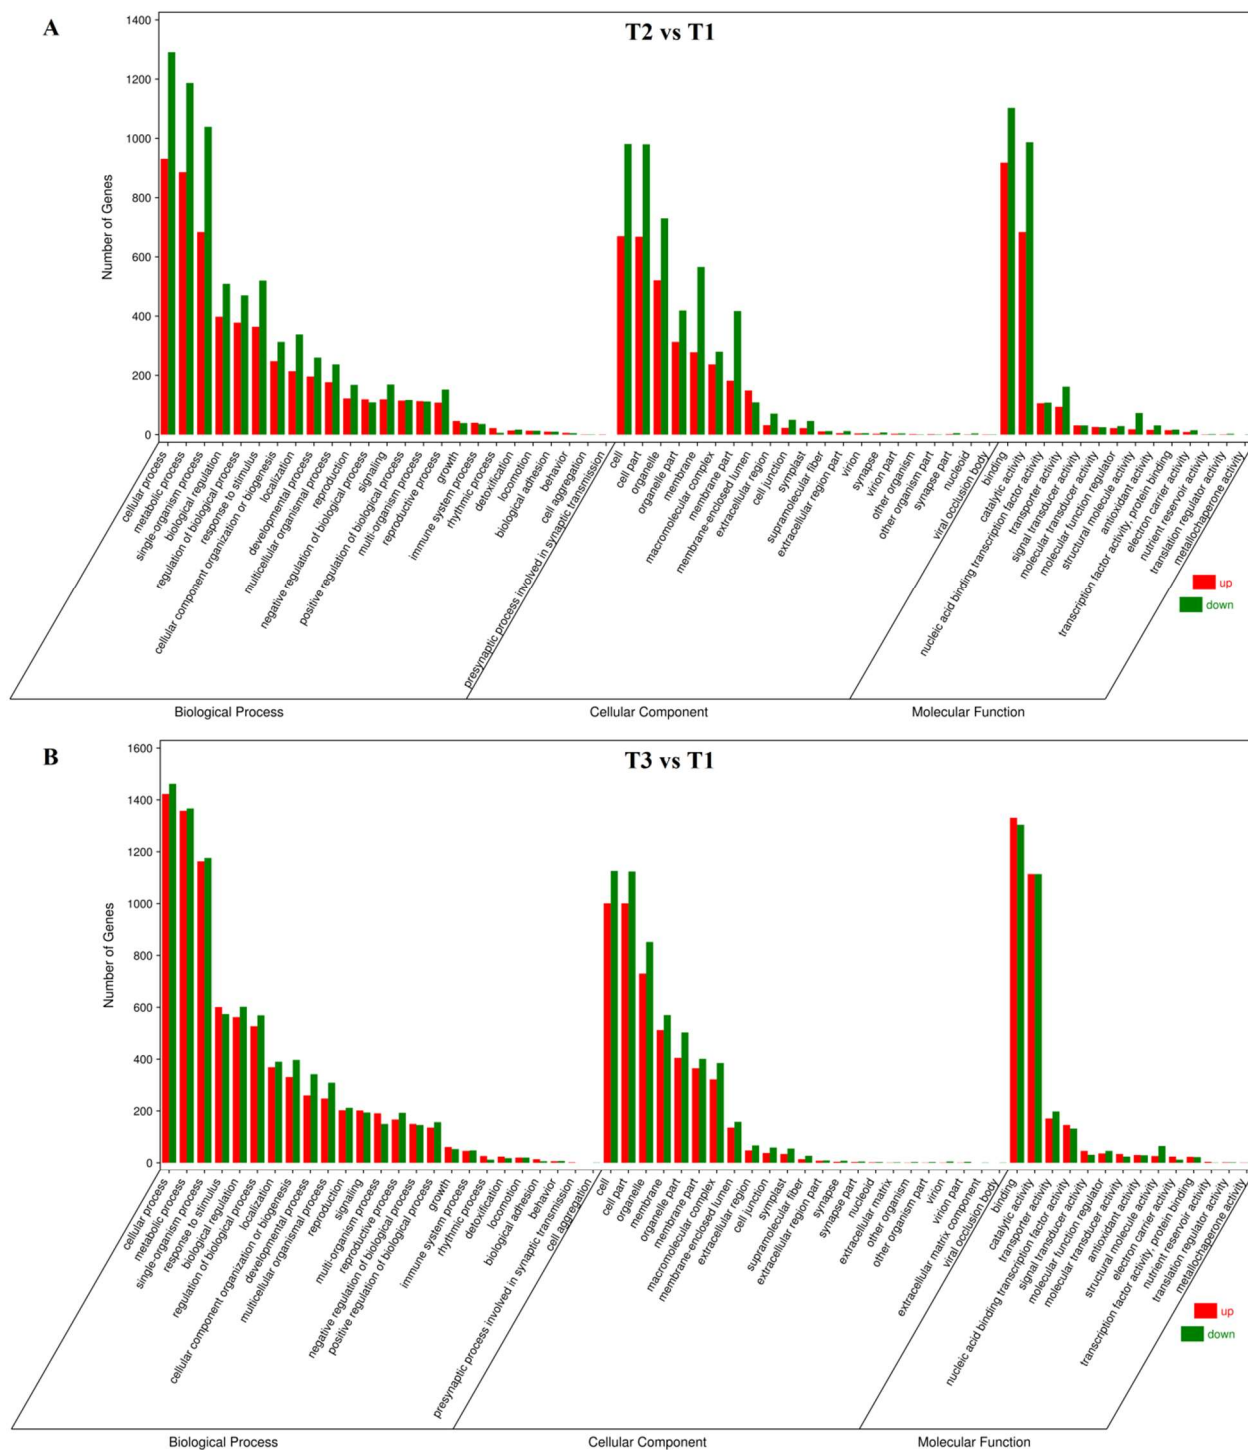

**Figure S9.** Gene Ontology (GO) enrichment of DEGs at T2 vs. T1 and T3 vs. T1.

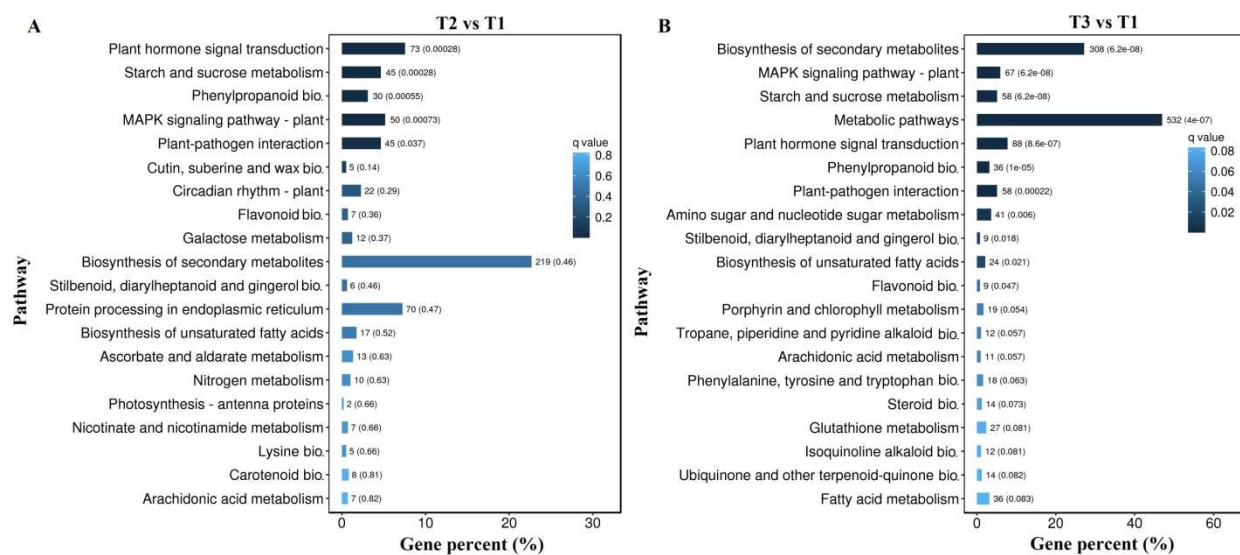

**Figure S10.** KEGG enrichment of DEGs at T2 vs. T1 and T3 vs. T1.

## Table supplementary legends

**Table S1.** Sequences of primer used in qRT-PCR validation.

| Gene name                     | Primer sequences (5' to 3')                                      | Amplicon size (bp) |
|-------------------------------|------------------------------------------------------------------|--------------------|
| <i>ACT</i>                    | Forward: TGGTATTGTGCTGGATTCTGGT<br>Reverse: TGAGATCACCACCAGCAAGG | 109                |
| <b>FLC expression (15)</b>    |                                                                  |                    |
| <i>VIL1</i>                   | Forward: TAAGGACGCTCGACGTGTTG<br>Reverse: TAGTTGAAACGCCACTCGCT   | 158                |
| <i>VIL2</i>                   | Forward: TCAGATAGGTCCCCACGGAG<br>Reverse: CTGCCCCAATGGTGGAAATCT  | 196                |
| <i>VRN1-L</i>                 | Forward: GCGTATGTACTACCACCCACC<br>Reverse: TTGCTTAACCCGACCCGAC   | 106                |
| <i>FCA</i>                    | Forward: CTTCAACACCGGGTGGTTCT<br>Reverse: TTGCGGCTTCGACTGGTTAT   | 122                |
| <i>FLK</i>                    | Forward: GGGATAAACGCTGTTGGTGG<br>Reverse: TAGGAGGCATGTCTGCAGGT   | 106                |
| <i>FPA</i>                    | Forward: TTGGTGAGCTTGAGAGCGTT<br>Reverse: GATTGCCCGCGACAGAAAAC   | 123                |
| <i>FY</i>                     | Forward: TGCGATGCCGCTATCCATAC<br>Reverse: TGTTGGAGCTGCTGAGCATT   | 174                |
| <i>FLD</i>                    | Forward: AGGCTACCACCAAGCGTTAC<br>Reverse: GGCAAGCACAAGAGTGTGTG   | 153                |
| <i>LD</i>                     | Forward: ATAGTGGCTGGATGGTTGGC<br>Reverse: CAGCATCAGGCAACTGTTTCG  | 198                |
| <i>LHP1</i>                   | Forward: CTGTTTCGTCGAAAGCGTGTT<br>Reverse: TACGCTTCCGCGATCTATGC  | 174                |
| <i>MAF1</i>                   | Forward: GTGGTTCTTTGCTGGCTACC<br>Reverse: TAACAACGCGCTTAAGCTTTCT | 171                |
| <i>VIP4</i>                   | Forward: ACTACGAGTCCCGACGTTCT<br>Reverse: CGTCGGGATGATTTCGAAGC   | 151                |
| <i>ATX2</i>                   | Forward: GATTTCGTGCTGAGCTTGGTG<br>Reverse: TCATCCTCTCCACTTGCACT  | 122                |
| <i>ARP6</i>                   | Forward: TGGAGCCACAGGACAACATAC<br>Reverse: ATCTCCGGCACAAGGAAACG  | 138                |
| <i>FRL3</i>                   | Forward: ATGCCAGCTCCTTGGTTACG<br>Reverse: GTCACGAAGACCGAAAGCAC   | 112                |
| <b>Sucrose metabolism (3)</b> |                                                                  |                    |
| <i>TPS1</i>                   | Forward: ACGCAGGGAGAATGGATGAC<br>Reverse: AACGGGGTGTCTTTTCAGTG   | 103                |
| <i>SUS3</i>                   | Forward: AGGGAAGTGGCAAACCTTGT<br>Reverse: ACCGATAGAGCTCGCCATTG   | 181                |
| <i>SPS</i>                    | Forward: GACGGTGAGAGGAATGATGGT<br>Reverse: TGTGTCCCCTTCATGCCAAC  | 119                |
| <b>Hormone response (5)</b>   |                                                                  |                    |
| <i>GID1B</i>                  | Forward: AGCCCCAGACAACGAAACTC                                    | 118                |



|                                                                |                                                                  |     |
|----------------------------------------------------------------|------------------------------------------------------------------|-----|
|                                                                | Reverse: GGAAGACGAATGGGCAAAGC                                    |     |
| <i>RAP2-7</i>                                                  | Forward: ACGCCGGTTGATTATCGGTT<br>Reverse: CCACGATACTGCGAGCTTCT   | 116 |
| <i>IAA13</i>                                                   | Forward: CTGCGATTGGACGAAAGGTG<br>Reverse: CCCCTCCATGCTTGATCGTG   | 122 |
| <i>ARF1</i>                                                    | Forward: ACTGTTTGCCCCATTGGAT<br>Reverse: AGCATCACCAGCAACCAACT    | 179 |
| <i>AHK3</i>                                                    | Forward: CGAACACATGGGGGTACAGG<br>Reverse: CCGACTGCTGGTTGATTTGC   | 184 |
| <b>Circadian clock (2)</b>                                     |                                                                  |     |
| <i>ELF3</i>                                                    | Forward: TGATGCCGAGTCTCGTGAAG<br>Reverse: CTGTGCCGGACATCGAATCT   | 107 |
| <i>COR27</i>                                                   | Forward: GGATTTGCATGGATCGCTGTC<br>Reverse: GTCCAGCAACCATCACGAAG  | 123 |
| <b>Downstream floral integrators and meristem identity (6)</b> |                                                                  |     |
| <i>FTIP3</i>                                                   | Forward: GGACAAGGTTCCCGGATGTT<br>Reverse: TCCTTGTTGGGTGCAACTCT   | 181 |
| <i>FTIP7</i>                                                   | Forward: TGGGAAGGTGGTGTTCGATG<br>Reverse: ATCACTATGCCATGCCTCGG   | 163 |
| <i>SOC1</i>                                                    | Forward: GAGAAGGCTTGGGATCGTGTT<br>Reverse: CTGCATTATCTGCTGCGAGG  | 159 |
| <i>AGL65</i>                                                   | Forward: AGGTCTCACCAGATTTTGCCG<br>Reverse: ATACGGGTGTTGGACTCTTGC | 100 |
| <i>SPL1</i>                                                    | Forward: AGCATCGCACCAAGACTCTC<br>Reverse: TCCTATCTGTGCGGCTCTCT   | 113 |
| <i>SOK2</i>                                                    | Forward: AACTGCTCCAAACACTCCAT<br>Reverse: GTTGTCGTTTGCTTGTTCGG   | 176 |
| <b>Cold response (9)</b>                                       |                                                                  |     |
| <i>PYL3</i>                                                    | Forward: GCTGCTCATCAGTGCTCTTCT<br>Reverse: TTTTCGTGGCTGGAAGACCT  | 193 |
| <i>ERF110</i>                                                  | Forward: ACCACTACAGCCACCTTGTC<br>Reverse: ACTCTAGCAGCTTTGTGCGG   | 137 |
| <i>ETR2</i>                                                    | Forward: TGCAGTGCTAGAAGAGTCGC<br>Reverse: GAATTCCTTGCGTGGGTAGC   | 108 |
| <i>COR413PM1</i>                                               | Forward: AGGCGCGATGATCCTTATCTG<br>Reverse: GAGGCGCGTATGTGTTCTG   | 129 |
| <i>CRPK1</i>                                                   | Forward: GAAGCTGAGATGTTGCGGTTT<br>Reverse: TTGCGAGGTGTAACGCCTAT  | 165 |
| <i>MPK3</i>                                                    | Forward: TGGCGCTTACGGAATTGTCT<br>Reverse: AGTTCGCTTCGCATCCATGT   | 109 |
| <i>SRK2E</i>                                                   | Forward: GTATGCATCCGGAGGAGAGC<br>Reverse: TCGCGGTGACATACTTGCAT   | 135 |
| <i>PP2CA</i>                                                   | Forward: CGTTCTCCGGTGGAAGTCAT<br>Reverse: CCTTGCACTTCATCGCAACC   | 186 |
| <i>HAB1</i>                                                    | Forward: ATATTAGCCAGCGACGGTCTG<br>Reverse: GTAACCGGCCCGTTCTTTCT  | 104 |

**Table S2.** The sequence details of the isoforms involved in the 104 co-expressed genes at T2 vs. T1 and T3 vs. T1. Note, the Table S2 is shown as a separate document of .txt format.

**Table S3.** DEGs involved in FLC expression at T2 vs. T1 and T3 vs. T1.

| Gene name                  | Swiss-Prot ID | Protein name                                               | FPKM value |       |
|----------------------------|---------------|------------------------------------------------------------|------------|-------|
|                            |               |                                                            | T2/T1      | T3/T1 |
| Inhibiting FLC expression  |               |                                                            |            |       |
| VIL1                       | Q9LHF5        | VIN3-like protein 1                                        | -1.28      | -0.40 |
| VIL2                       | Q9SUM4        | VIN3-like protein 2                                        | -1.43      | -1.18 |
| VRN1-L                     | A0A6P4B193    | B3 domain-containing transcription factor VRN1-like        | -0.55      | 2.07  |
| FCA                        | O04425        | Flowering time control protein FCA                         | 0.85       | 2.47  |
| FLK                        | Q9SR13        | Flowering locus K homology domain                          | 0.21       | -0.42 |
| FPA                        | Q8LPQ9        | Flowering time control protein FPA                         | 1.04       | -1.15 |
| FY                         | Q6NLV4        | Flowering time control protein FY                          | 0.29       | -0.19 |
| FLD                        | Q9CAE3        | Protein FLOWERING LOCUS D                                  | -0.77      | -0.35 |
| LD                         | Q38796        | Homeobox protein LUMINIDEPENDENS                           | -1.17      | -1.71 |
| LHP1                       | Q944N1        | Chromo domain protein LHP1                                 | 0.98       | 0.80  |
| MAF1                       | Q7ZWL6        | Repressor of RNA polymerase III transcription homolog MAF1 | -1.41      | -1.33 |
| Activating FLC expression  |               |                                                            |            |       |
| VIP4                       | Q9FNQ0        | Protein LEO1 homolog                                       | 1.36       | 0.31  |
| ATX2                       | P0CB22        | Histone-lysine N-methyltransferase ATX2                    | 0.31       | -8.75 |
| ATX4                       | Q9SUE7        | Histone-lysine N-methyltransferase ATX4                    | 0.11       | -1.55 |
| ATX5                       | Q8GZ42        | Histone-lysine N-methyltransferase ATX5                    | 0.34       | -0.86 |
| ARP6                       | Q8LGE3        | Actin-related protein 6                                    | -1.06      | -1.10 |
| PIE1                       | Q7X9V2        | Protein PHOTOPERIOD-INDEPENDENT EARLY FLOWERING 1          | 0.37       | 1.78  |
| FRL3                       | Q67ZB3        | FRIGIDA-like protein 3                                     | 1.27       | -1.48 |
| FES1                       | Q84VG7        | Protein FRIGIDA-ESSENTIAL 1                                | 1.11       | 1.47  |
| SUF4                       | Q9C5G0        | Protein SUPPRESSOR OF FRI 4                                | 2.31       | 1.17  |
| Interacting FLC expression |               |                                                            |            |       |
| CLF                        | P93831        | Histone-lysine N-methyltransferase CLF                     | -0.02      | -0.56 |
| FIE2                       | Q6ZJX0        | Polycomb group protein FIE1                                | 1.03       | -0.92 |

**Table S4.** DEGs involved in sucrose metabolism at T2 vs. T1 and T3 vs. T1.

| Gene name    | Swiss-Prot ID | Protein name                                          | FPKM value |       |
|--------------|---------------|-------------------------------------------------------|------------|-------|
|              |               |                                                       | T2/T1      | T3/T1 |
| <i>TPS1</i>  | Q9SYM4        | Alpha, alpha-trehalose-phosphate synthase 1           | 1.35       | 1.04  |
| <i>TPS5</i>  | O23617        | Alpha, alpha-trehalose-phosphate synthase 5           | -1.50      | -1.42 |
| <i>TPS7</i>  | Q9LMI0        | Probable alpha, alpha-trehalose-phosphate synthase 7  | 0.59       | 1.61  |
| <i>TPS10</i> | O80738        | Probable alpha, alpha-trehalose-phosphate synthase 10 | 3.22       | 3.12  |

|             |        |                                       |       |       |
|-------------|--------|---------------------------------------|-------|-------|
| <i>SUS2</i> | O24301 | Sucrose synthase 2                    | -1.12 | -1.55 |
| <i>SUS3</i> | Q9M111 | Sucrose synthase 3                    | 1.11  | -1.70 |
| <i>SPS</i>  | Q43845 | Probable sucrose-phosphate synthase   | -1.55 | -2.92 |
| <i>SPS1</i> | O22060 | Probable sucrose-phosphate synthase 1 | -1.00 | -2.45 |
| <i>PGMP</i> | Q9SCY0 | Phosphoglucomutase, chloroplastic     | -1.59 | -1.00 |
| <i>PGM1</i> | Q9ZSQ4 | Phosphoglucomutase, cytoplasmic       | -1.83 | -3.19 |
| <i>BAM1</i> | Q9LIR6 | Beta-amylase 1, chloroplastic         | -2.86 | -1.88 |
| <i>BAM3</i> | O23553 | Beta-amylase 3, chloroplastic         | -2.36 | -1.67 |

**Table S5.** DEGs involved in hormone response at T2 vs. T1 and T3 vs. T1.

| Gene name          | Swiss-Prot ID | Protein name                                    | FRPM value |       |
|--------------------|---------------|-------------------------------------------------|------------|-------|
|                    |               |                                                 | T2/T1      | T3/T1 |
| <b>Gibberellin</b> |               |                                                 |            |       |
| <i>GID1B</i>       | Q9LYC1        | Gibberellin receptor GID1B                      | -0.28      | 5.56  |
| <b>Ethylene</b>    |               |                                                 |            |       |
| <i>RAP2-3</i>      | P42736        | Ethylene-responsive transcription factor RAP2-3 | -2.44      | -2.39 |
| <i>RAP2-7</i>      | Q9SK03        | Ethylene-responsive transcription factor RAP2-7 | -2.07      | -0.74 |
| <b>Auxin</b>       |               |                                                 |            |       |
| <i>GH3.6</i>       | Q9LSQ4        | Indole-3-acetic acid-amido synthetase GH3.6     | -2.67      | -3.50 |
| <i>LAX2</i>        | Q9S836        | Auxin transporter-like protein 2                | -3.68      | -5.37 |
| <i>IAA8</i>        | Q38826        | Auxin-responsive protein IAA8                   | -1.46      | -1.13 |
| <i>IAA9</i>        | Q38827        | Auxin-responsive protein IAA9                   | -1.46      | -1.25 |
| <i>IAA12</i>       | Q38830        | Auxin-responsive protein IAA12                  | -2.60      | -2.52 |
| <i>IAA13</i>       | Q38831        | Auxin-responsive protein IAA13                  | -1.04      | 0.06  |
| <i>IAA27</i>       | Q9ZSY8        | Auxin-responsive protein IAA27                  | -3.31      | -4.02 |
| <i>ARF1</i>        | Q8L7G0        | Auxin response factor 1                         | -1.26      | -1.07 |
| <i>ARF4</i>        | Q9ZTX9        | Auxin response factor 4                         | -1.33      | -1.58 |
| <i>ARF5</i>        | P93024        | Auxin response factor 5                         | -2.21      | -1.54 |
| <i>ARF6</i>        | Q9ZTX8        | Auxin response factor 6                         | 1.02       | 1.04  |
| <i>ARF19</i>       | Q0D9R7        | Auxin response factor 19                        | -1.75      | -1.93 |
| <b>Cytokinin</b>   |               |                                                 |            |       |
| <i>AHK3</i>        | Q9C5U1        | Histidine kinase 3                              | 2.42       | 2.25  |
| <i>AHP1</i>        | Q9ZNV9        | Histidine-containing phosphotransfer protein 1  | 1.58       | -0.12 |
| <i>ARR2</i>        | Q9ZWJ9        | Two-component response regulator ARR2           | -1.61      | 0.71  |

**Table S6.** DEGs involved in circadian clock at T2 vs. T1 and T3 vs. T1.

| Gene name    | Swiss-Prot ID | Protein name              | FPKM value |       |
|--------------|---------------|---------------------------|------------|-------|
|              |               |                           | T2/T1      | T3/T1 |
| <i>ELF3</i>  | O82804        | Protein EARLY FLOWERING 3 | 1.58       | 1.58  |
| <i>COR27</i> | Q8L8T7        | Cold-regulated protein 27 | 1.68       | 1.80  |

**Table S7.** DEGs involved in downstream floral integrators and meristem identity at T2 vs. T1 and T3 vs. T1.

| Gene name        | Swiss-Prot ID | Protein name                                                  | FRPM value |       |
|------------------|---------------|---------------------------------------------------------------|------------|-------|
|                  |               |                                                               | T2/T1      | T3/T1 |
| <i>FTIP3</i>     | Q9M2R0        | FT-interacting protein 3                                      | 2.40       | 1.55  |
| <i>FTIP7</i>     | Q60EW9        | FT-interacting protein 7                                      | 1.27       | 1.59  |
| <i>SOC1</i>      | O64645        | MADS-box protein SOC1                                         | 1.00       | 0.32  |
| <i>AGL65</i>     | Q7X9I0        | Agamous-like MADS-box protein AGL65                           | -1.74      | 1.25  |
| <i>SPL1</i>      | Q9SMX9        | Squamosa promoter-binding-like protein 1                      | 1.19       | -1.18 |
| <i>SPL6</i>      | Q94JW8        | Squamosa promoter-binding-like protein 6                      | 1.90       | -2.31 |
| <i>AP2</i>       | P47927        | Floral homeotic protein APETALA 2                             | -0.03      | 1.65  |
| <i>AP2-1</i>     | B8AXC3        | APETALA2-like protein 1                                       | -2.43      | -1.53 |
| <i>AP2-2</i>     | B8AMA9        | APETALA2-like protein 2                                       | -1.51      | -1.14 |
| <i>AP2-3</i>     | B8B8J2        | APETALA2-like protein 3                                       | -1.29      | -0.24 |
| <i>AIL5</i>      | Q6PQQ3        | AP2-like ethylene-responsive transcription factor AIL5        | -1.84      | 1.22  |
| <i>ANT</i>       | Q38914        | AP2-like ethylene-responsive transcription factor ANT         | -1.36      | -1.92 |
| <i>At2g41710</i> | Q8GWK2        | AP2-like ethylene-responsive transcription factor At2g41710   | -1.84      | -1.57 |
| <i>TEM1</i>      | Q9C6M5        | AP2/ERF and B3 domain-containing transcription repressor TEM1 | 1.55       | 1.28  |
| <i>SOK2</i>      | Q9LX14        | Protein SOSEKI 2                                              | -3.63      | 3.03  |

**Table S8.** DEGs genes involved in cold response at T2 vs. T1 and T3 vs. T1.

| Gene name        | Swiss-Prot ID | Protein name                                        | FRPM value |       |
|------------------|---------------|-----------------------------------------------------|------------|-------|
|                  |               |                                                     | T2/T1      | T3/T1 |
| <i>PYL3</i>      | Q6EN42        | Absciscic acid receptor PYL3                        | 1.13       | 1.30  |
| <i>PYL4</i>      | O80920        | Absciscic acid receptor PYL4                        | 1.15       | 7.36  |
| <i>ERF3</i>      | Q9SXS8        | Ethylene-responsive transcription factor 3          | 1.30       | 1.16  |
| <i>ERF5</i>      | Q9LW48        | Ethylene-responsive transcription factor 5          | 2.52       | 4.58  |
| <i>ERF010</i>    | Q9FH94        | Ethylene-responsive transcription factor ERF010     | 1.84       | 2.25  |
| <i>ERF011</i>    | Q9SNE1        | Ethylene-responsive transcription factor ERF011     | 1.28       | 1.42  |
| <i>ERF13</i>     | Q8L9K1        | Ethylene-responsive transcription factor 13         | 1.93       | 0.65  |
| <i>ERF110</i>    | Q70II3        | Ethylene-responsive transcription factor ERF110     | 1.79       | 3.32  |
| <i>ERF118</i>    | Q9CA27        | Ethylene-responsive transcription factor ERF118     | 2.00       | 1.23  |
| <i>ETR2</i>      | Q0WPQ2        | Ethylene receptor 2                                 | 2.17       | 1.92  |
| <i>COR413PM1</i> | Q9XIM7        | Cold-regulated 413 plasma membrane protein 1        | 1.10       | -2.42 |
| <i>COR413PM2</i> | Q9SVL6        | Cold-regulated 413 plasma membrane protein 2        | 4.07       | -3.29 |
| <i>CRPK1</i>     | Q93YN1        | Cold-responsive protein kinase 1                    | -3.00      | 1.17  |
| <i>MPK3</i>      | Q39023        | Mitogen-activated protein kinase 3                  | 1.61       | 3.47  |
| <i>MPK9</i>      | Q9LV37        | Mitogen-activated protein kinase 9                  | 1.38       | -1.07 |
| <i>MPK16</i>     | Q8W4J2        | Mitogen-activated protein kinase 16                 | 1.30       | 2.22  |
| <i>YDA</i>       | Q9CAD5        | Mitogen-activated protein kinase kinase kinase YODA | -1.41      | -2.57 |
| <i>SRK2E</i>     | Q940H6        | Protein phosphatase 2C 70                           | 1.25       | 0.48  |

|                     |        |                                    |       |       |
|---------------------|--------|------------------------------------|-------|-------|
| <i>PP2CA</i>        | P49598 | Protein phosphatase 2C 3           | -2.87 | -4.23 |
| <i>HAB1</i>         | Q9CAJ0 | Protein phosphatase 2C 16          | -1.90 | -5.44 |
| <i>HAB2</i>         | Q9LNP9 | Protein phosphatase 2C 7           | -3.51 | -3.64 |
| <i>KAPP</i>         | P46014 | Protein phosphatase 2C 37          | 1.48  | -1.35 |
| <i>PPC6-1</i>       | Q9M8R7 | Probable protein phosphatase 2C 33 | 1.01  | 1.31  |
| <i>PPC6-7</i>       | Q0WRB2 | Probable protein phosphatase 2C 73 | -1.19 | -1.24 |
| <i>PP2C27</i>       | P93006 | Probable protein phosphatase 2C 27 | -1.88 | 1.48  |
| <i>PP2C38</i>       | Q9LHJ9 | Probable protein phosphatase 2C 38 | -2.25 | 1.39  |
| <i>At2g30020</i>    | O80871 | Probable protein phosphatase 2C 25 | 1.75  | 2.70  |
| <i>Os02g0799000</i> | Q69QZ0 | Probable protein phosphatase 2C 27 | 2.87  | 2.02  |
| <i>At3g15260</i>    | Q9LDA7 | Probable protein phosphatase 2C 39 | -3.08 | -3.72 |
| <i>At3g16560</i>    | Q9LUS8 | Probable protein phosphatase 2C 40 | 1.61  | 2.82  |
| <i>At3g62260</i>    | Q3EAF9 | Probable protein phosphatase 2C 49 | -1.46 | 0.34  |
| <i>Os06g0651600</i> | Q67UP9 | Probable protein phosphatase 2C 58 | 1.24  | -0.19 |
| <i>At4g31860</i>    | Q9SZ53 | Probable protein phosphatase 2C 60 | 0.06  | -0.99 |
| <i>TGA2.2</i>       | Q6IVC3 | Transcription factor TGA2.2        | -2.00 | -0.96 |
| <i>CDC5</i>         | P92948 | Cell division cycle 5-like protein | 3.83  | 9.48  |
